# Supplementary material for: Unraveling surface polarization in hydrothermally derived AgFeO2 nanosheets for enhanced photoelectrochemical performance
Source: Royal Society of Chemistry journal article supplement (doi:10.1039/d4ta06367h), 2024-12-10
Supplement: d4ta06367h1.pdf [file d4ta06367h1.pdf]

## Supporting Information

for

# Unraveling Surface Polarization in Hydrothermally Derived AgFeO<sub>2</sub> Nanosheets for Enhanced Photoelectrochemical Performance

Shui-Miao Yu,<sup>#</sup> Xu-Dong Dong,<sup>#</sup> Zong-Yan Zhao<sup>\*</sup>

Faculty of Materials Science and Engineering, Kunming University of Science and Technology,  
Kunming 650093, P. R. China

<sup>#</sup> These authors have equal contributions.

<sup>\*</sup> Corresponding author, e-mail: zzy@kust.edu.cn

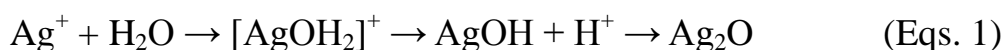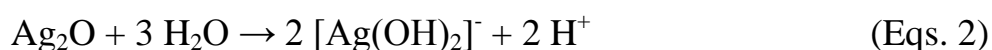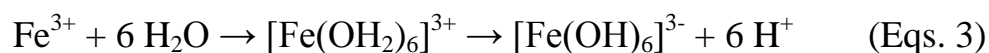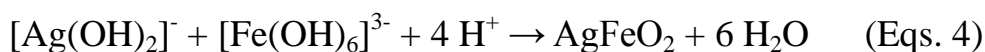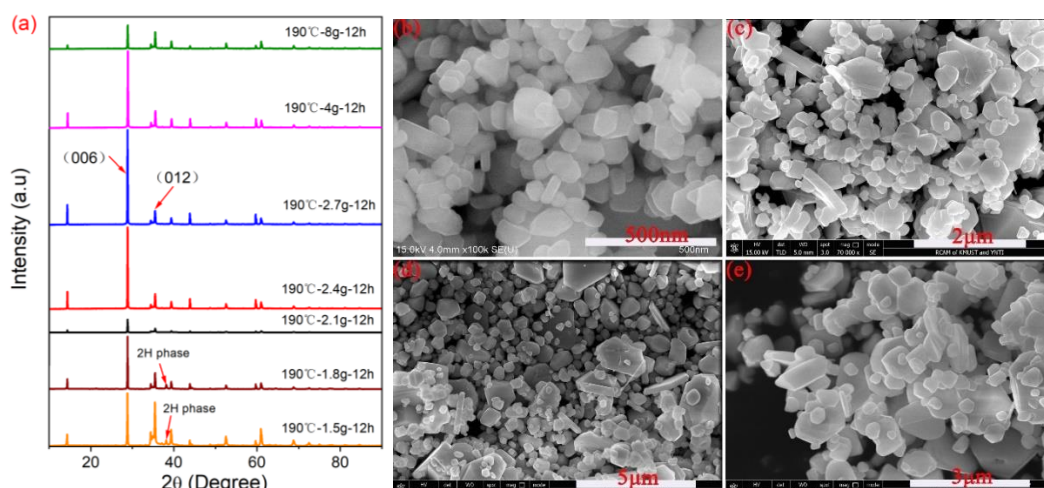

**Figure S1.** (a) XRD patterns; (b-e) SEM images of AgFeO<sub>2</sub> nanosheets with different NaOH additions at 2.1, 2.7, 4.0 and 8.0 g, respectively.

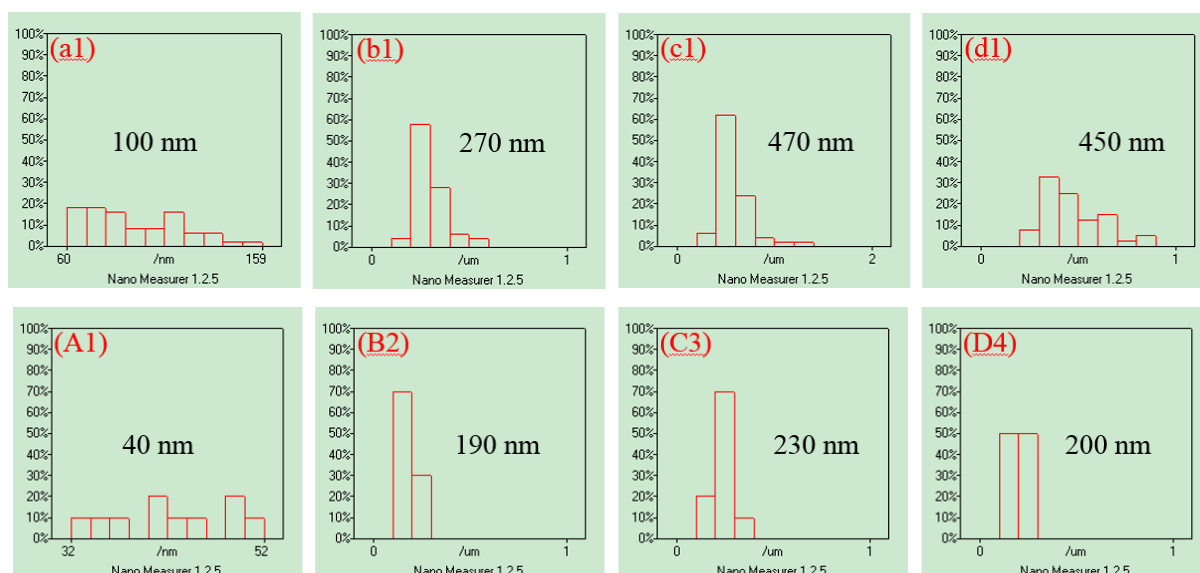

**Figure S2.** Influence of different NaOH concentrations on the width (A1-D1) and thickness (A1-D4) of  $\text{AgFeO}_2$  nanosheets.

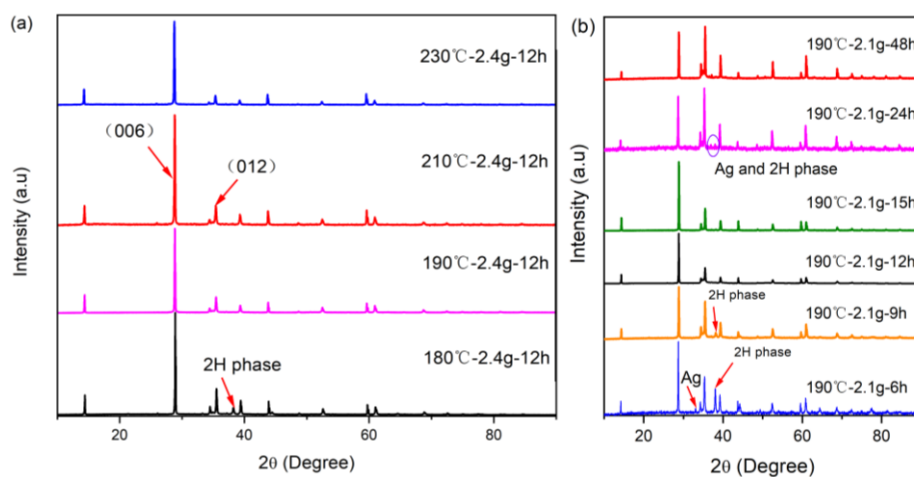

**Figure S3.** XRD patterns of  $\text{AgFeO}_2$  nanosheets under (a) different reaction temperatures and (b) reaction time.

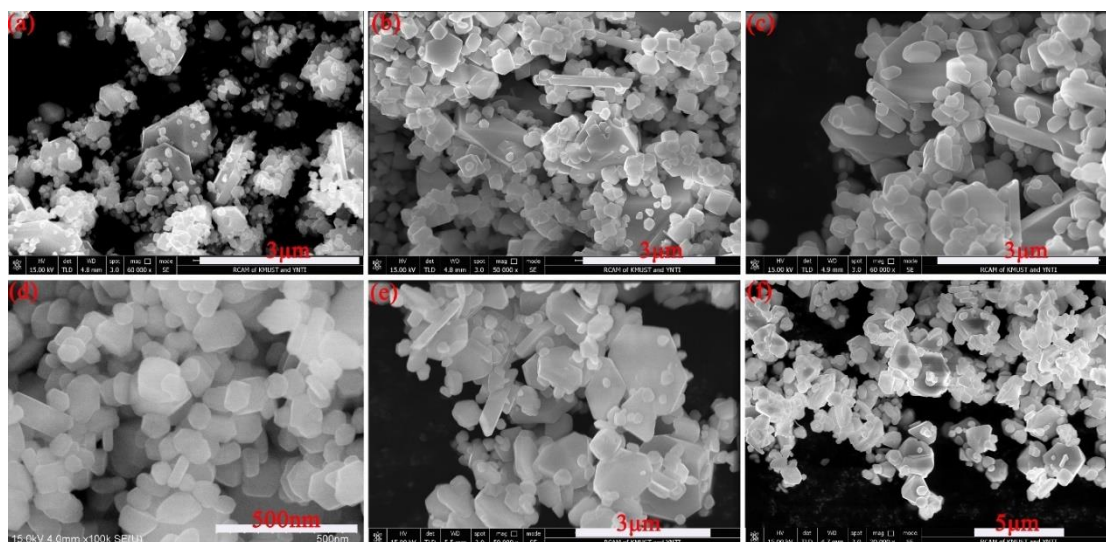

**Figure S4.** SEM images of  $\text{AgFeO}_2$  nanosheet sizes regulated by different (a-c) reaction temperatures at 190, 210 and 230°C; (d-f) reaction time for 12, 15 and 24 h.

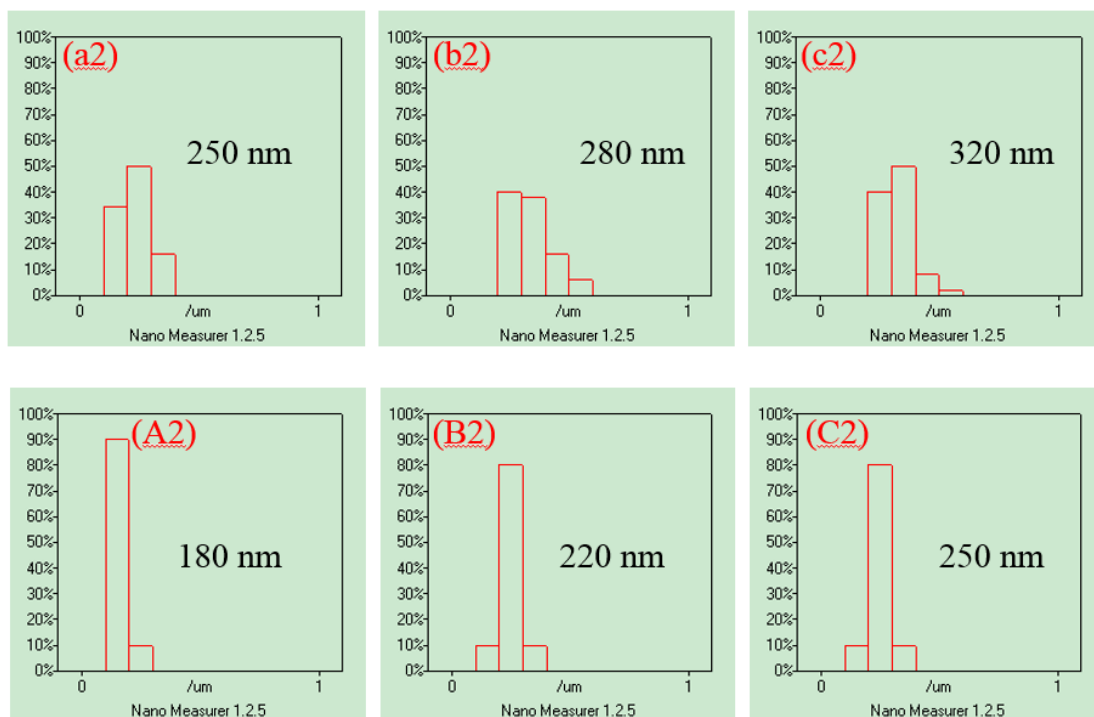

**Figure S5.** Effects of different reaction temperatures on the width (a2-c2) and thickness (A2-C2) of  $\text{AgFeO}_2$  nanosheets.

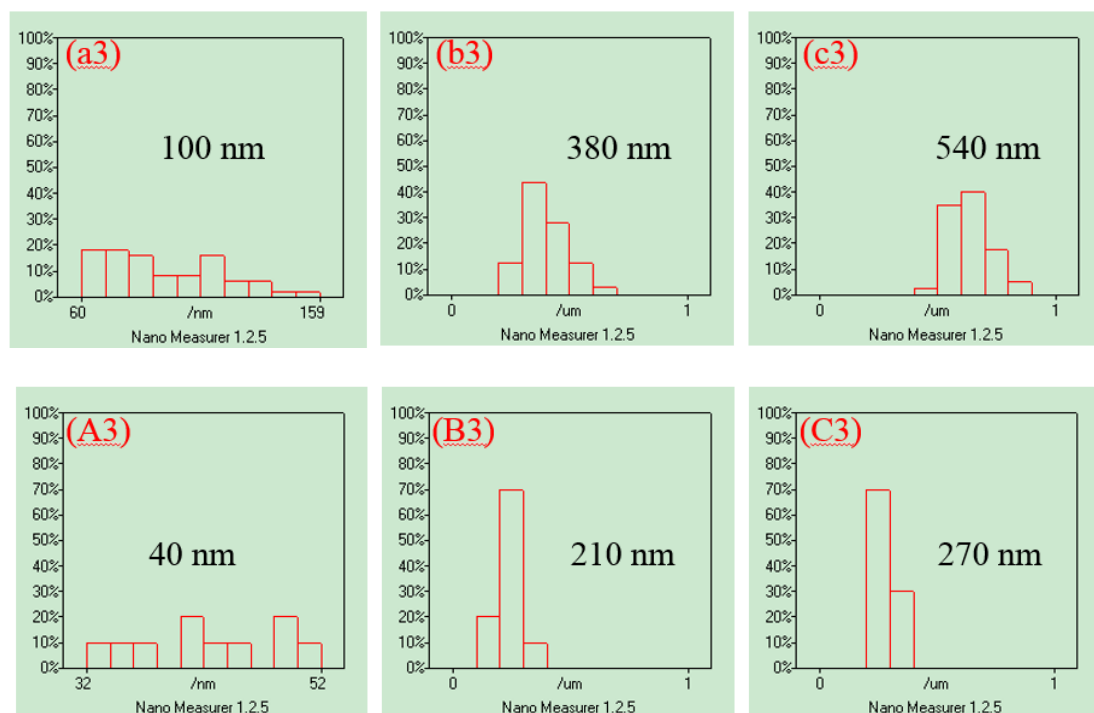

**Figure S6.** Effects of different reaction times on the width (a3-c3) and thickness (A3-C3) of  $\text{AgFeO}_2$  nanosheets.

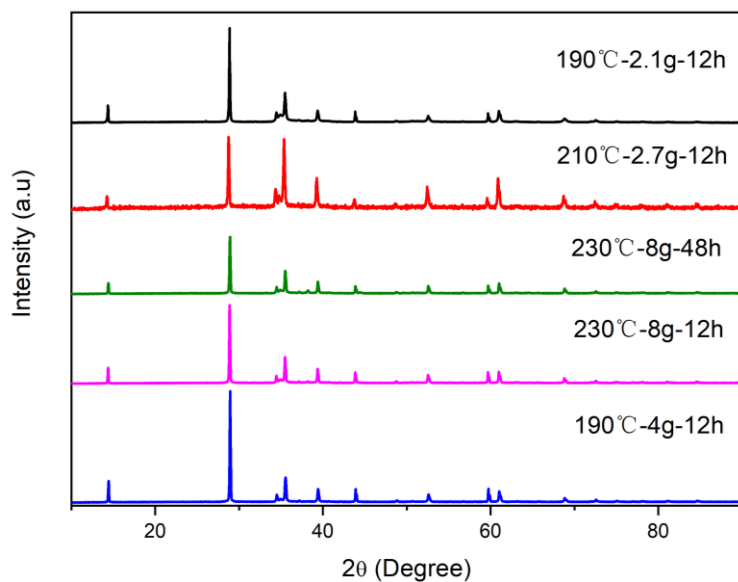

**Figure S7.** XRD pattern of  $\text{AgFeO}_2$  nanosheets with different thickness.

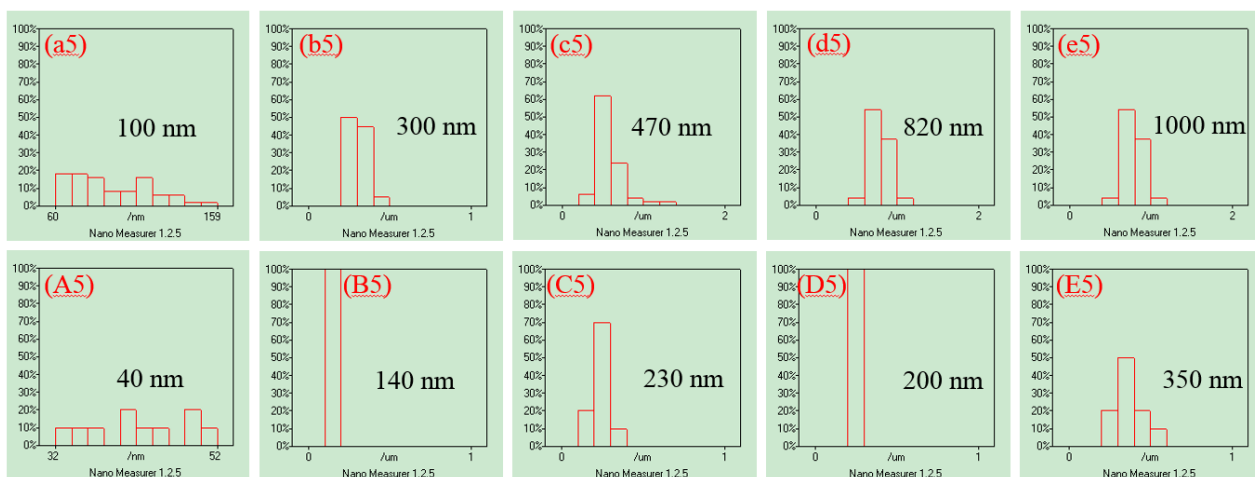

**Figure S8.** (a5-e5) width and (A5-E5) thickness of  $\text{AgFeO}_2$  nanosheets with different thicknesses.

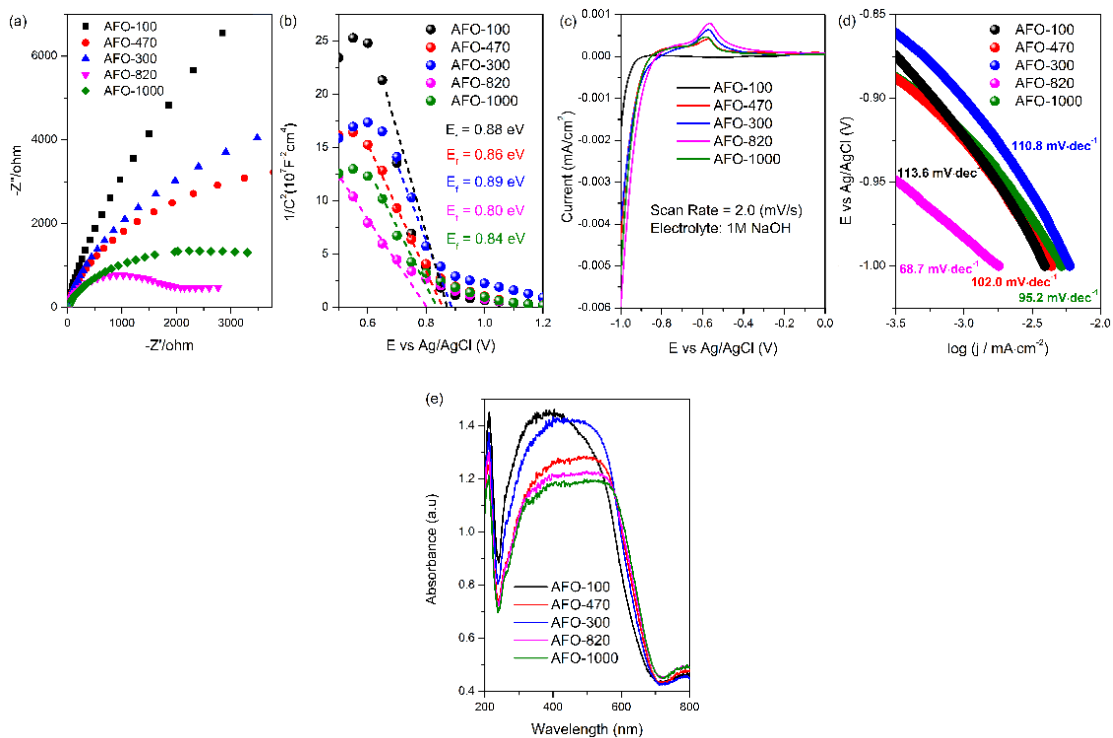

**Figure S9.** (a) EIS curve; (b) M-S curve; (c) LSV curve; (d) Tafel slope diagram; (e) UV-VIS curve of  $\text{AgFeO}_2$  electrodes with different thickness.

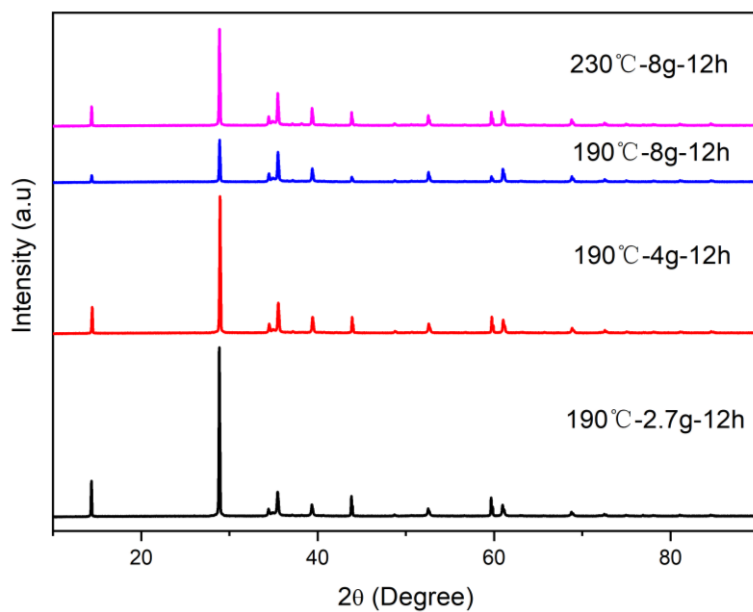

**Figure S10.** XRD patterns; (b-e) SEM of  $\text{AgFeO}_2$  nanosheets regulated by different (001) polar surfaces.

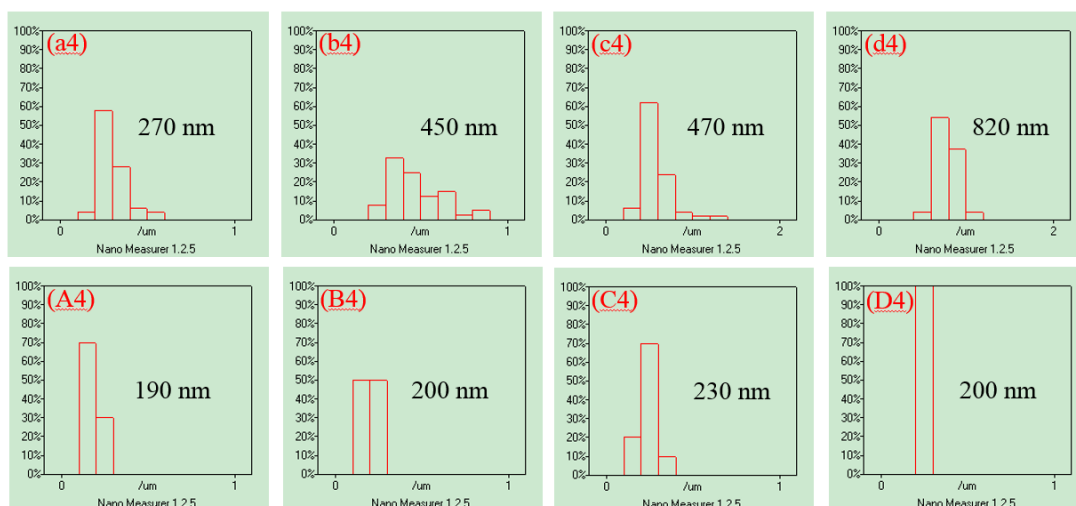

**Figure S11.** (a4-d4) width and (A4-D4) thickness of  $\text{AgFeO}_2$  nanosheets with different (001) polar exposed surfaces.

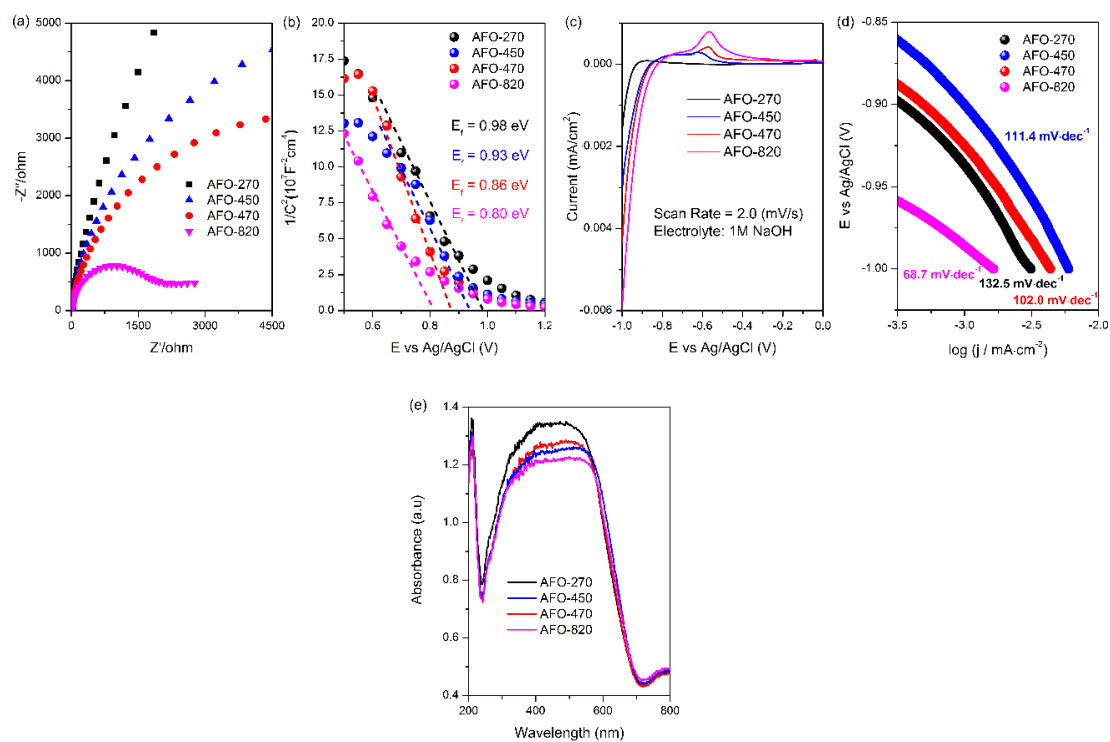

**Figure S12.** (a) EIS curves; (b) M-S curve; (c) the LSV curve; (d) Tafel slope diagram; (e) UV-Vis curve of  $\text{AgFeO}_2$  electrodes with different (001) polarity exposure surfaces.

**Table S1.** The regulation of hydrothermal reaction temperature, time and NaOH concentration on the size of AgFeO<sub>2</sub> nanosheets.

| Reaction temperature | Reaction time | NaOH concentration  | Nanosheet width | Nanosheet thickness | Crystalline phase       | Sample labeling |
|----------------------|---------------|---------------------|-----------------|---------------------|-------------------------|-----------------|
| 190 °C               | 12 h          | 1.5 g (1.875 mol/L) | -               | -                   | No pure phase is formed | -               |
| 190 °C               | 12 h          | 1.8 g (2.250 mol/L) | -               | -                   | No pure phase is formed | -               |
| 190 °C               | 12 h          | 2.1 g (2.625 mol/L) | 100 nm          | 40 nm               | 3R                      | AFO-100         |
| 190 °C               | 12 h          | 2.7 g (3.375 mol/L) | 270 nm          | 190 nm              | 3R                      | AFO-270         |
| 190 °C               | 12 h          | 4.0 g (5.000 mol/L) | 470 nm          | 230 nm              | 3R                      | AFO-470         |
| 190 °C               | 12 h          | 8.0 g (10.00 mol/L) | 450 nm          | 200 nm              | 3R                      | AFO-450         |
| 180 °C               | 12 h          | 2.4 g (3.000 mol/L) | -               | -                   | No pure phase is formed |                 |
| 190 °C               | 12 h          | 2.4 g (3.000 mol/L) | 250 nm          | 180 nm              | 3R                      | AFO-250         |
| 210 °C               | 12 h          | 2.4 g (3.000 mol/L) | 280 nm          | 220 nm              | 3R                      | AFO-280         |
| 230 °C               | 12 h          | 2.4 g (3.000 mol/L) | 320 nm          | 250 nm              | 3R                      | AFO-320         |
| 190 °C               | 6 h           | 2.1 g (2.625 mol/L) | -               | -                   | No pure phase is formed |                 |
| 190 °C               | 9 h           | 2.1 g (2.625 mol/L) | -               | -                   | No pure phase is formed |                 |
| 190 °C               | 15 h          | 2.1 g (2.625 mol/L) | 380 nm          | 210 nm              | 3R                      | AFO-380         |
| 190 °C               | 24 h          | 2.1 g (2.625 mol/L) | 540 nm          | 270 nm              | 2H, 3R                  | AFO-540         |
| 190 °C               | 48 h          | 2.1 g (2.625 mol/L) | -               | -                   | No pure phase is formed |                 |
| 210 °C               | 12 h          | 2.7 g (3.375 mol/L) | 300 nm          | 140 nm              | 3R                      | AFO-300         |
| 230 °C               | 12 h          | 8.0 g (10.00 mol/L) | 820 nm          | 200 nm              | 3R                      | AFO-820         |
| 230 °C               | 48 h          | 8.0 g (10.00 mol/L) | 1000 nm         | 350 nm              | 3R                      | AFO-1000        |

**Table S2.** The BET area and electrochemically active surface area (ECSA) of typical AgFeO<sub>2</sub> nanosheets.

| Characteristics         | Label    | Thickness (nm) | BET area (m <sup>2</sup> /g) | $\frac{\text{BET area}}{\text{Thickness}}$ | Normalized ECSA (cm <sup>2</sup> ) | $\frac{\text{ECSA}}{\text{Thickness}}$ |
|-------------------------|----------|----------------|------------------------------|--------------------------------------------|------------------------------------|----------------------------------------|
| Comparable exposed area | AFO-100  | 40             | 3.8246                       | 0.0956                                     | 0.7412                             | 0.0185                                 |
|                         | AFO-300  | 140            | 5.4547                       | 0.0390                                     | 0.7456                             | 0.0053                                 |
|                         | AFO-820  | 200            | 6.9024                       | 0.0345                                     | 0.7450                             | 0.0038                                 |
|                         | AFO-470  | 230            | 6.5179                       | 0.0283                                     | 0.7432                             | 0.0032                                 |
|                         | AFO-1000 | 350            | 4.7389                       | 0.0135                                     | 0.9729                             | 0.0028                                 |
| Comparable thickness    | AFO-820  | 200            | 6.9024                       | 0.0345                                     | 0.7450                             | 0.0038                                 |
|                         | AFO-470  | 230            | 6.5179                       | 0.0283                                     | 0.7432                             | 0.0032                                 |
|                         | AFO-450  | 200            | 5.6059                       | 0.0280                                     | 0.6295                             | 0.0031                                 |
|                         | AFO-270  | 190            | 3.6666                       | 0.0193                                     | 0.5673                             | 0.0030                                 |
